# Supplementary material for: Herbicide Applications Reduce Gaseous N Losses: A Field Study of Three Consecutive Wheat–Maize Rotation Cycles in the North China Plain
Source: MDPI journal article supplement (doi:10.3390/agronomy14020283), 2024-01-27
Supplement: s1 [file s1]

# Supplementary information:

Table S1 Seasonal ammonia volatilization in soil during maize and wheat seasons from 2013 to 2016

| Year      | Treatment | Maize season volatilization<br>(kg N hm <sup>-2</sup> ) |            |          | Wheat season volatilization<br>(kg N hm <sup>-2</sup> ) |            |          | annual volatilization<br>(kg N hm <sup>-2</sup> ) |
|-----------|-----------|---------------------------------------------------------|------------|----------|---------------------------------------------------------|------------|----------|---------------------------------------------------|
|           |           | Basic fertilization                                     | topdrssing | Sum      | Basic fertilization                                     | Topdrssing | Sum      |                                                   |
| 2013-2014 | CK        | 7.27 c                                                  | 2.06 c     | 9.32 c   | 6.95 b                                                  | 5.21 b     | 12.15 b  | 21.48 c                                           |
|           | CN        | 9.65 a                                                  | 14.51 a    | 24.16 a  | 11.99 a                                                 | 6.40 ab    | 18.38 a  | 42.55 a                                           |
|           | AC-FE     | 9.03 ab                                                 | 12.19 b    | 21.22 b  | 11.65 a                                                 | 6.85 a     | 18.50 a  | 39.72 ab                                          |
|           | 2,4D-DI   | 7.94 bc                                                 | 11.97 b    | 19.91 b  | 12.30 a                                                 | 5.77 ab    | 18.07 a  | 37.97 b                                           |
| 2014-2015 | CK        | 6.80 c                                                  | 4.56 b     | 11.36 c  | 6.85 b                                                  | 2.78 a     | 9.63 b   | 20.99 b                                           |
|           | CN        | 8.90 a                                                  | 6.08 a     | 14.98 a  | 7.79 a                                                  | 3.31 a     | 11.10 a  | 26.08 a                                           |
|           | AC-FE     | 8.15 b                                                  | 6.01 a     | 14.17 ab | 7.75 a                                                  | 3.00 a     | 10.75 ab | 24.92 a                                           |
|           | 2,4D-DI   | 7.55 b                                                  | 6.26 a     | 13.81 b  | 7.45 ab                                                 | 3.11 a     | 10.56 ab | 24.37 a                                           |
| 2015-2016 | CK        | 2.67 c                                                  | 7.21 b     | 9.88 b   | 9.09 b                                                  | 5.21 b     | 14.30 b  | 24.18 b                                           |
|           | CN        | 3.92 a                                                  | 11.24 a    | 15.16 a  | 11.98 a                                                 | 5.94 a     | 17.92 a  | 33.08 a                                           |
|           | AC-FE     | 3.63 ab                                                 | 11.10 a    | 14.73 a  | 11.34 a                                                 | 5.51 ab    | 16.85 a  | 31.57 a                                           |
|           | 2,4D-DI   | 3.35 b                                                  | 10.83 a    | 14.18 a  | 11.76 a                                                 | 6.07 a     | 17.83 a  | 32.01 a                                           |

Data are mean values  $\pm$  standard deviation. Different lowercase letters in the same line indicate significant differences between different N loss at  $p < 0.05$ .

Table S2 Seasonal denitrification in soil during maize and wheat seasons from 2013 to 2016

| Year      | Treatment | Maize season denitrification<br>(kg N hm <sup>-2</sup> ) |            |         | Wheat season denitrification<br>(kg N hm <sup>-2</sup> ) |            |         | annual<br>denitrification<br>(kg N hm <sup>-2</sup> ) |
|-----------|-----------|----------------------------------------------------------|------------|---------|----------------------------------------------------------|------------|---------|-------------------------------------------------------|
|           |           | Basic fertilization                                      | topdrssing | Sum     | Basic fertilization                                      | Topdrssing | Sum     |                                                       |
| 2013-2014 | CK        | 3.79 b                                                   | 0.87 c     | 4.66 c  | 0.18 b                                                   | 0.15 c     | 0.34 c  | 4.99 b                                                |
|           | CN        | 6.95 a                                                   | 4.24 a     | 11.19 a | 0.29 ab                                                  | 0.29 ab    | 0.58 ab | 11.77 a                                               |
|           | AC-FE     | 4.16 b                                                   | 2.41 b     | 6.57 bc | 0.31 a                                                   | 0.36 a     | 0.67 a  | 7.24 b                                                |
|           | 2,4D-DI   | 5.86 ab                                                  | 2.02 b     | 7.88 b  | 0.19 ab                                                  | 0.22 bc    | 0.41 bc | 8.29 b                                                |
| 2014-2015 | CK        | 0.55 b                                                   | 0.63 b     | 1.18 c  | 0.23 b                                                   | 0.48 b     | 0.71 b  | 1.90 c                                                |
|           | CN        | 1.56 a                                                   | 2.27 a     | 3.83 a  | 0.25 ab                                                  | 1.68 a     | 1.93 a  | 5.76 a                                                |
|           | AC-FE     | 0.88 b                                                   | 1.91 a     | 2.78 b  | 0.28 ab                                                  | 1.75 a     | 2.03 a  | 4.81 ab                                               |
|           | 2,4D-DI   | 0.60 b                                                   | 1.74 a     | 2.33 b  | 0.30 a                                                   | 1.43 ab    | 1.73 a  | 4.07 b                                                |
| 2015-2016 | CK        | 0.57 c                                                   | 0.30 b     | 0.88 b  | 0.20 a                                                   | 0.10 a     | 0.31 a  | 1.18 b                                                |
|           | CN        | 1.55 a                                                   | 0.95 a     | 2.50 a  | 0.26 a                                                   | 0.12 a     | 0.38 a  | 2.88 a                                                |
|           | AC-FE     | 1.31 ab                                                  | 0.88 a     | 2.19 a  | 0.21 a                                                   | 0.17 a     | 0.38 a  | 2.57 a                                                |
|           | 2,4D-DI   | 0.91 bc                                                  | 0.98 a     | 1.89 a  | 0.23 a                                                   | 0.11 a     | 0.34 a  | 2.23 a                                                |

Data are mean values  $\pm$  standard deviation. Different lowercase letters in the same line indicate significant differences between different N loss at  $p < 0.05$ .
